# Supplementary material
Source: ML conference proceedings conference paper supplement (https://openreview.net/forum?id=piLPYqxtWuA)
Supplement: supplementary_material [file attachment]

# Details in Variance Control

Note: Because FastSpeech has already demonstrated the ability to control speed and breaks, and FastSpeech 2 and 2s inherits its advantages of robust and controllable speech synthesis, we only demonstrate examples for controlling pitch and energy (volume) in synthesized speech.

## Pitch Control

FastSpeech 2 and 2s can control the pitch of each frame arbitrarily.

The following picture demonstrates: the pitch value of each frame is multiplied by a factor, i.e., 0.75 and 1.50.

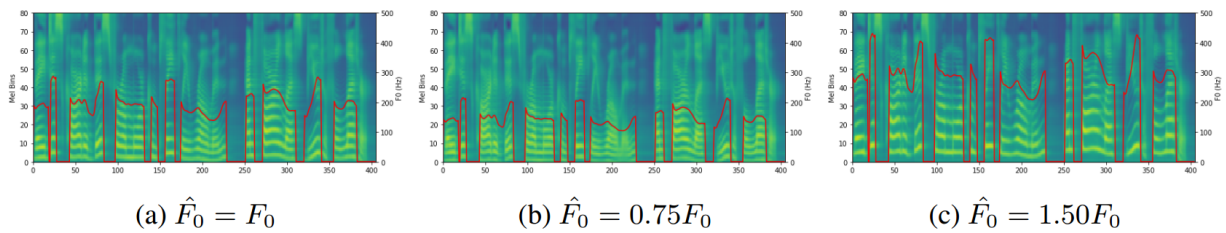

## Energy (Volume) Control

FastSpeech 2 and 2s can control the energy of each frame arbitrarily.

We demonstrate using a factor curve to control the energy of each frame.

Use sinusoidal curves of different periods to multiply with the predicted energy, which results in periodic volume change in synthesized speech.

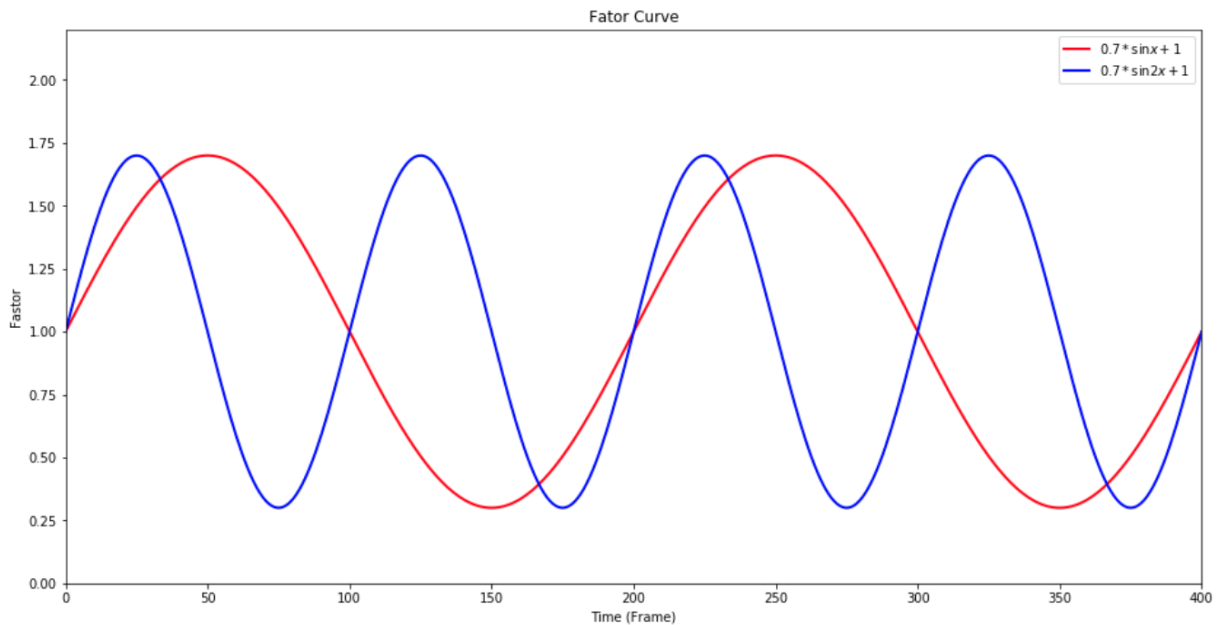

## Directory Structure

```
├─ fs2_energy    control energy in FastSpeech 2
|   └─ audio1    amp0.7_period100/amp0.7_period200 indicates factor curve is the blue/red one
|                  respectively
|   |   └─ pred_LJ001-0001_amp0.7_period100.png
|   |   └─ pred_LJ001-0001_amp0.7_period100.wav
```

```
| | └─ pred_LJ001-0001_amp0.7_period200.png
| | └─ pred_LJ001-0001_amp0.7_period200.wav
| | └─ pred_LJ001-0001.png
| | └─ pred_LJ001-0001.wav
| | └─ transcripts.txt
| └─ audio2
|   | ...
└─ fs2_pitch    control pitch in FastSpeech 2
  | └─ audio1    pitch0.75 means the factor is 0.75
  | | └─ pred_LJ001-0035_pitch0.75.png
  | | └─ pred_LJ001-0035_pitch0.75.wav
  | | └─ pred_LJ001-0035_pitch1.0.png
  | | └─ pred_LJ001-0035_pitch1.0.wav
  | | └─ pred_LJ001-0035_pitch1.5.png
  | | └─ pred_LJ001-0035_pitch1.5.wav
  | | └─ transcripts.txt
  | └─ audio2
  |   | ...
└─ fs2s_energy  control energy in FastSpeech 2s
  | ...
└─ fs2s_pitch   control pitch in FastSpeech 2s
  | ...
└─ README.md
```
